# Supplementary material
Source: HighWire-hosted journal article supplement (https://fmch.bmj.com/content/8/4/e000607)
Supplement: inline-supplementary-material-1 [file inline-supplementary-material-1.pdf]

Appendix Table 1: Demographics of Patients for Diabetes Diagnosis Outcomes Pre- and Post-Affordable Care Act by Medicaid Expansion Status

|                                                  | Pre-Affordable Care Act* |                  | Post-Affordable Care Act* |                  |
|--------------------------------------------------|--------------------------|------------------|---------------------------|------------------|
|                                                  | Non-Expansion States     | Expansion States | Non-Expansion States      | Expansion States |
| Total Patients                                   | N= 145,435               | N= 198,558       | N=215,039                 | N= 264,644       |
| Race/Ethnicity                                   | N (%)                    | N (%)            | N (%)                     | N (%)            |
| Hispanic                                         | 44,932 (30.9)            | 53,173 (26.8)    | 70,979 (33.0)             | 68,330 (25.8)    |
| Missing                                          | 13,102 (9.0)             | 14,846 (7.5)     | 20,764 (9.7)              | 24,595 (9.3)     |
| NH Black                                         | 42,257 (29.1)            | 13,557 (6.8)     | 57,138 (26.6)             | 17,002 (6.4)     |
| NH Other                                         | 2,990 (2.1)              | 10,529 (5.3)     | 5,301 (2.5)               | 14,748 (5.6)     |
| NH White                                         | 42,154 (29.0)            | 106,453 (53.6)   | 60,857 (28.3)             | 139,969 (52.9)   |
| Sex                                              |                          |                  |                           |                  |
| Female                                           | 91,877 (63.2)            | 117,263 (59.1)   | 132,449 (61.6)            | 148,442 (56.1)   |
| Male                                             | 53,555 (36.8)            | 81,291 (40.9)    | 82,586 (38.4)             | 116,197 (43.9)   |
| Not Indicated                                    | 3 (0.0)                  | 4 (0.0)          | 4 (0.0)                   | 5 (0.0)          |
| Age at first visit, N (%)                        |                          |                  |                           |                  |
| 19 to 25                                         | 24,975 (17.2)            | 35,206 (17.7)    | 34,128 (15.9)             | 44,955 (17.0)    |
| 26 to 39                                         | 46,513 (32.0)            | 72,638 (36.6)    | 69,479 (32.3)             | 97,129 (36.7)    |
| 40 to 64                                         | 71,447 (49.1)            | 85,572 (43.1)    | 110,803 (51.5)            | 120,761 (45.6)   |
| N/A                                              | 2,500 (1.7)              | 5,142 (2.6)      | 629 (0.3)                 | 1,799 (0.7)      |
| Federal Poverty Level (Most frequently recorded) |                          |                  |                           |                  |
| ≤138                                             | 117,049 (80.5)           | 132,763 (66.9)   | 168,277 (78.3)            | 175,009 (66.1)   |
| >138                                             | 15,168 (10.4)            | 25,457 (12.8)    | 28,085 (13.1)             | 41,642 (15.7)    |
| N/A                                              | 13,218 (9.1)             | 40,338 (20.3)    | 18,677 (8.7)              | 47,993 (18.1)    |
| Insurance (Most frequently recorded)             |                          |                  |                           |                  |
| Private                                          | 8,077 (5.6)              | 33,379 (16.8)    | 45,272 (21.1)             | 46,458 (17.6)    |
| Public                                           | 57,559 (39.6)            | 93,176 (46.9)    | 73,130 (34.0)             | 170,358 (64.4)   |
| Uninsured                                        | 77,299 (53.2)            | 66,861 (33.7)    | 96,008 (44.6)             | 46,028 (17.4)    |
| N/A                                              | 2,500 (1.7)              | 5,142 (2.6)      | 629 (0.3)                 | 1,800 (0.7)      |

## Notes

NH: non-Hispanic

\*All demographics were significantly different ( $p < 0.001$ ) between expansion and non-expansion states in both the pre- and post-ACA periods

Patients with visits in both periods contribute distinct demographics in the pre- and post-Affordable Care Act columns
